# Supplementary material
Source: publisher site journal article supplement (https://www.dovepress.com/get_supplementary_file.php?f=263637.docx)
Supplement: Supplementary file 1 [file get_supplementary_file.php]

**
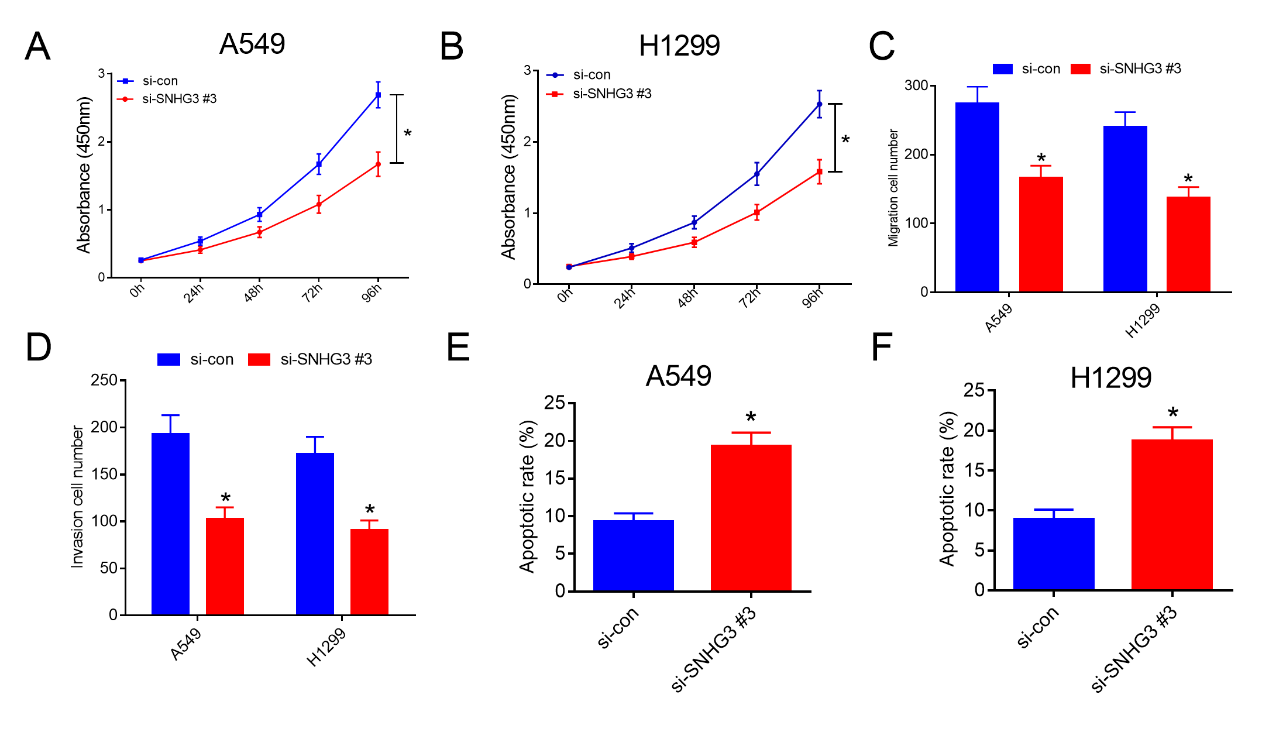
**

**Supplement Figure 1. SNHG3 knockdown suppressed proliferation, migration and invasion, and induced apoptosis in NSCLC cells.** A549 and H1299 cells were transfected with si-con or si-SNHG3 #3. (A and B) The proliferation activity of A549 and H1299 cells was evaluated by CCK-8 assay. (C and D) The migration and invasion of A549 and H1299 cells were determined by Transwell assays. (E and F) Cell apoptosis was determined by flow cytometry analysis in A549 and H1299 cells. **P* < 0.05.


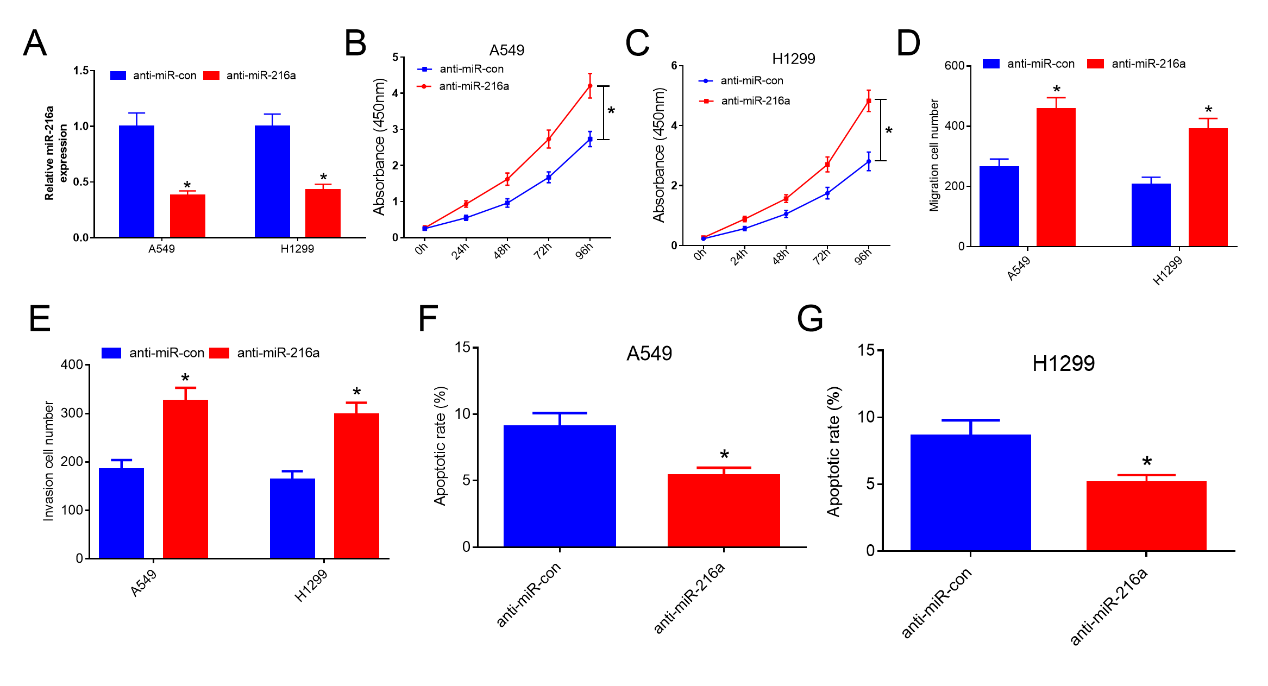


**Supplement Figure 2. miR-216a inhibition promoted proliferation, migration and invasion and suppressed apoptosis in NSCLC cells.** A549 and H1299 cells were transfected with anti-miR-con or anti-miR-216a, followed by determination of miR-216a expression by qRT-PCR analysis (A), cell viability by CCK-8 assay (B and C), migration and invasion by Transwell migration and invasion assays (D and E), and cell apoptosis by flow cytometry analysis (F and G). **P* < 0.05.


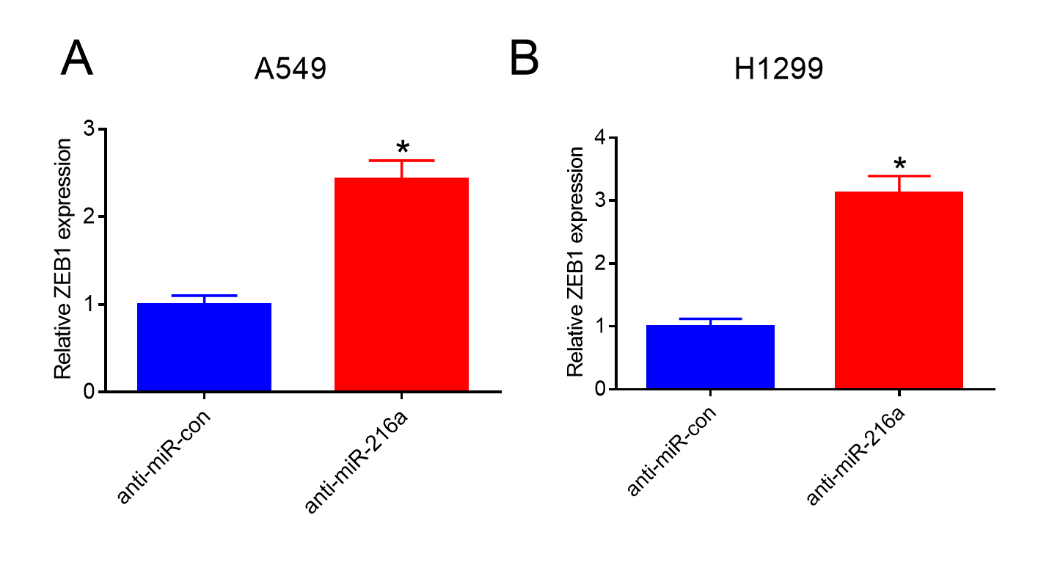


**Supplement Figure 3. miR-216a inhibition increased ZEB1 expression in NSCLC cells.** (A and B) The expression of ZEB1 in A549 and H1299 cells transfected with anti-miR-con or anti-miR-216a.
